1 *The application of drones for mosquito larval habitat identification in rural environments: a practical*  
2 *approach for malaria control?*

3 **Authors:**

4 Michelle C Stanton<sup>1,2</sup>, Patrick Kalonde<sup>3</sup>, Kennedy Zembere<sup>3</sup>, Remy Hoek Spaans<sup>1,2</sup>, Christopher M  
5 Jones<sup>1,3</sup>

6 <sup>1</sup>Vector Biology Department, Liverpool School of Tropical Medicine, Liverpool, UK

7 <sup>2</sup>Lancaster Medical School, Lancaster University, Lancaster, UK

8 <sup>3</sup>Malawi-Liverpool-Wellcome Trust Clinical Research Programme, Blantyre, Malawi

9 **Corresponding author:** Michelle C Stanton, Vector Biology Department, Liverpool School of Tropical  
10 Medicine, Liverpool UK L3 5QA

11 Email: [michelle.stanton@lstmed.ac.uk](mailto:michelle.stanton@lstmed.ac.uk)

12

13 **Running headline:** *Drones for mosquito larval habitat identification*

## 14 **Abstract**

- 15 1. Spatial and temporal trends in mosquito-borne diseases are driven by the locations and  
16 seasonality of larval habitat. One method of disease control is to decrease the mosquito  
17 population by removing habitat and/or reduce the likelihood of larvae developing into adults,  
18 known as larval source management (LSM). In malaria control, LSM is currently considered  
19 impractical in rural areas due to perceived difficulties in identifying target areas. High resolution  
20 drone mapping is being considered as a practical solution to address this barrier. In this paper, we  
21 use our experiences of drone-led larval habitat identification in Malawi to assess the accuracy and  
22 practicalities of this approach.
- 23 2. Drone imagery and larval surveys were conducted in Kasungu district, Malawi between 2018-  
24 2020. Water bodies and aquatic vegetation were identified in the imagery using both manual  
25 methods and geographical object-based image analysis (GeoOBIA) and the performance of the  
26 classifications were compared. Larval sampling sites were characterised by biotic factors visible in  
27 drone imagery (e.g. vegetation coverage, type), and generalised linear mixed models were used  
28 to determine their association with larval presence.
- 29 3. Imagery covering an area of 8.9km<sup>2</sup> across eight sites was captured. Characteristics associated  
30 with rural larval habitat were successfully identified using GeoOBIA (e.g. median accuracy = 0.98,  
31 median kappa = 0.96 using a standard RGB camera), with a median of 18.3% being classed as  
32 surface water, compared to 20.1% using manual identification. The GeoOBIA approach, however,  
33 required greater processing time and technical skills. Larval samples were captured from 326 sites,  
34 and a relationship was identified between larval presence and vegetation (log-OR=1.44, p=0.01).  
35 Vegetation type was also a significant factor when considering late stage anopheline larvae only.
- 36 4. Our study demonstrates the potential for drone-acquired imagery as a tool to support the  
37 identification of mosquito larval habitat in rural areas where malaria is endemic. There are,  
38 however, technical challenges to overcome before it can be smoothly integrated into malaria  
39 control activities. Further consultations between experts and stakeholders in the fields of drones,

40 image analysis and vector control are needed to develop more detailed guidance on how this  
41 technology can be most effectively exploited.

42

43 **Key words**

44 Drones, machine-learning, object-based image classification, mosquito, Anopheles, malaria, larval

45 habitat, mapping

## 46 Introduction

47 Malaria cases in Africa have reduced by over half in the last two decades making transmission more  
48 heterogeneous. This has led to a growth of studies applying spatial and temporal analyses to  
49 determine where and when remaining transmission foci exist (Stresman, Bousema, & Cook, 2019),  
50 and a focus on how new and existing control methods can be best utilised to reduce this residual  
51 transmission (Bousema et al., 2016; Hsiang et al., 2020; Sy et al., 2019).

52 The geographical spread and extent of malaria transmission is limited by the seasonally-driven mosaic  
53 of water bodies available for female mosquitoes in which to lay their eggs. The ecology of preferred  
54 breeding grounds for mosquito oviposition vary both within and between species. For example, two  
55 of the main sibling species of the *Anopheles gambiae* sensu lato complex, *An. gambiae* and *An.*  
56 *arabiensis*, are found in transient, sunlit, small pools whereas *Anopheles funestus* is associated with  
57 more permanent, larger vegetated water (Nambung et al., 2020). At the micro-geographic scale, the  
58 presence of mosquito larvae may differ over the course of just a few metres (Eneh, Fillinger, Borg  
59 Karlson, Kuttuva Rajarao, & Lindh, 2019; Gowelo et al., 2020; Musiime et al., 2020). Biotic and abiotic  
60 factors such as the presence of specific types of vegetation, microbiota, predators, algal density,  
61 shade, and water depth influence larval development.

62 Mosquito larval populations are fixed in space for the duration of their development to adulthood.  
63 Typically, eggs hatch into larvae within 2-3 days of oviposition and take 5-10 days to metamorphosise  
64 into pupae, although the speed of this process is highly dependent on temperature (Beck-Johnson et  
65 al., 2013). One method of controlling diseases transmitted by mosquitoes is to reduce the population  
66 by reducing the availability of oviposition sites and/or reduce the likelihood that resulting larvae  
67 develop into the adult stage (World Health Organization, 2013). Larval source management (LSM)  
68 involves the environmental, biological or chemical manipulation of the environment in which  
69 mosquitoes are present for the purpose of targeting the immature, aquatic stages of the mosquito  
70 and hence reducing the adult mosquito population. In the early days of mosquito control, an

71 aggressive approach to searching and removing mosquito breeding sites was successful at reducing  
72 (and even eliminating) disease, with historical examples including its use during the construction of  
73 the Panama Canal in the early 20<sup>th</sup> Century, and its role in the elimination of *Anopheles gambiae* in  
74 Brazil by 1940 (Tusting et al., 2013). In sub-Saharan Africa, LSM was responsible for large reductions  
75 in malaria incidence in Zambia copper mines between 1929 and 1949 (Fillinger & Lindsay, 2011). LSM  
76 is, however, a labour-intensive exercise and following the introduction of IRS by DDT in the 1950s and  
77 subsequently the development of ITNs in the 1990s, it fell out of favour as a viable control option,  
78 particularly in Africa where the long rainy seasons produce countless sites for *Anopheles* development  
79 (Fillinger & Lindsay, 2011). As such, LSM is currently only recommended as a complementary vector  
80 control intervention to bed nets and IRS to target residual transmission and as a method of combating  
81 insecticide resistance (Killeen, 2014). While its value is acknowledged by WHO and national malaria  
82 control programmes (NMCPs) there are several barriers to its widespread implementation.

83 The primary barrier to implementing LSM is the issue of determining where and when the intervention  
84 should be implemented. In rural settings the WHO recommend the application of LSM in areas where  
85 there is high coverage of long-lasting insecticidal nets (LLINs), evidence of outdoor biting and/or  
86 insecticide resistance and where larval sources are '*few, fixed and findable*'. Despite the lack of a clear  
87 definition of what can be considered '*few*' or '*findable*', this has led to many considering LSM to be  
88 impractical in rural areas with diffuse seasonal larval habitats. The perception of these terms may  
89 evolve as technology and processes for implementing LSM advance. This paper focuses on challenging  
90 the '*findable*' component of this trio of conditions.

91 Geospatial technology is rapidly evolving and what now constitutes as '*findable*' may switch from less  
92 reliance on exhaustive ground-based searches to remotely sensed data. Drone mapping is being  
93 touted as at least equivalent (if not superior) to and more cost-effective than mapping larval habitat  
94 manually (Carrasco-Escobar et al., 2019; Hardy, Makame, Cross, Majambere, & Msellem, 2017) or  
95 using remotely sensed satellite imagery. While the latter can cover vast areas in a single day, images

96 are often obscured by clouds and although very high-resolution commercial satellite imagery exists,  
97 the resolution (at best 30 cm) is still inferior to that obtained by drones (2-10 cm) with the time of  
98 image captured out of the data user's control.

99 In this paper we explore the use of drones as a method for collecting very high resolution,  
100 contemporary imagery of an area for the purposes of identifying larval habitat. We tackle issues  
101 relating to the process of capturing drone imagery (by who, how much, how often), processing the  
102 images to extract the required information (what software, image classification methods, computer  
103 processing requirements), collecting 'ground-truth' data (entomological sampling), and subsequently  
104 summarising this information into recommendations that can be used by the control program  
105 implementers to guide their LSM activities.

## 106 **Materials and Methods**

### 107 *Drone image capturing*

108 A series of image data capture exercises were conducted within Kasungu district, central Malawi in an  
109 area that has been designated by the Government of Malawi, in collaboration with UNICEF, as a  
110 'humanitarian drone testing corridor' (Fig. 1). Authorisation to conduct these flights was obtained  
111 from the Malawi Department of Civil Aviation. Malaria transmission occurs all year round in this area,  
112 with parasite prevalence in children between 2 and 10 years old estimated at 19% in 2017 (Chipeta et  
113 al., 2019). This transmission is potentially driven by a number of reservoirs which provide permanent  
114 sources of water within which female *Anopheles* can lay their eggs (Kibret, Lautze, McCartney, Nhamo,  
115 & Wilson, 2016). Images were captured over three visits in June 2018 (early dry season), October 2019  
116 (late dry season) and February 2020 (wet season) using two drones, both of which were able to  
117 capture images using a standard RGB camera, plus a near-infrared (NIR) camera. Both drones were  
118 purchased off-the-shelf from commercial vendors. The first was a multirotor (quadcopter) type aimed  
119 towards the 'hobbyist' market (the DJI Phantom 4 Pro), supplemented by an additional NIR sensor by

120 Sentera (Sentera, 2020). The second was a fixed-wing drone marketed towards the agriculture  
121 industry (eBee SQ) which incorporated a Parrot Sequoia multispectral camera.

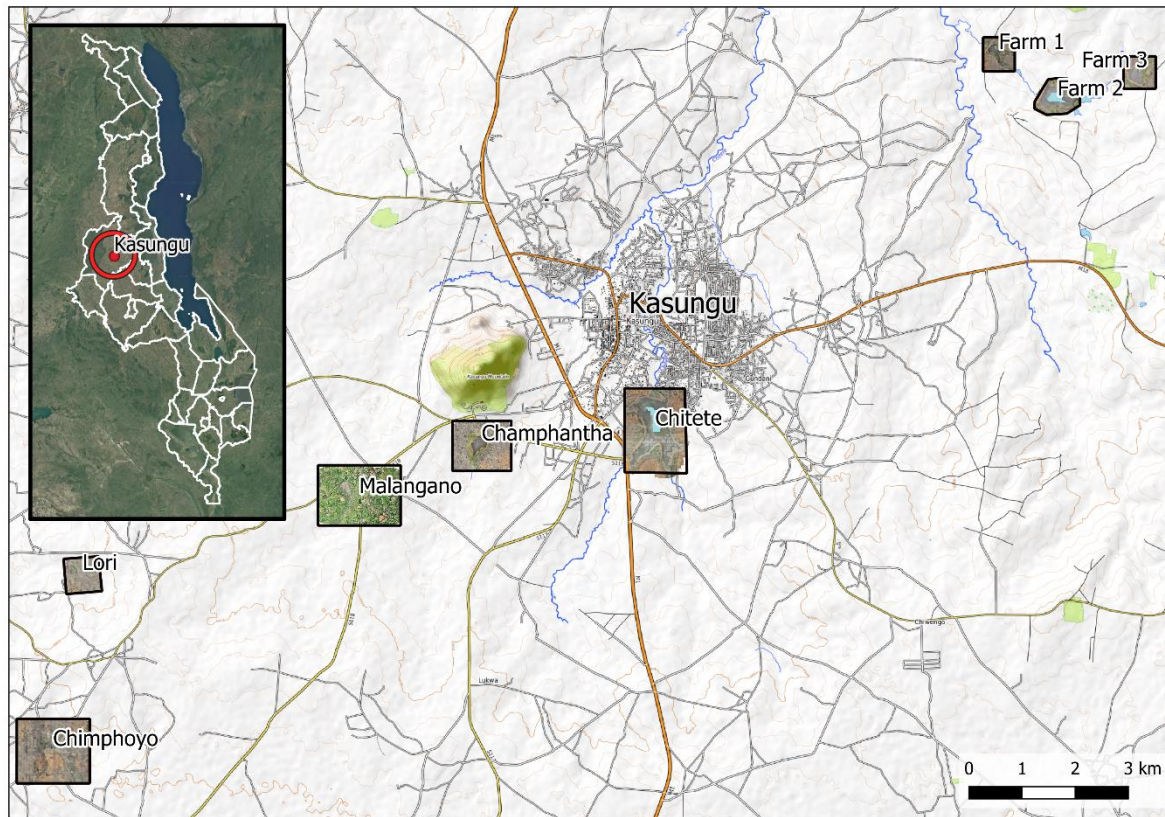

122  
123 Figure 1: Locations of sites surveyed within the ‘humanitarian drone testing corridor’, centred on  
124 Kasungu town, Central Malawi (inset). Coordinates can be found in Table S1.

### 125 *Drone image processing*

126 Individual images captured during each mapping mission were stitched together into orthomosaics  
127 using the commercial image processing software Agisoft Metashape Professional (version 1.4.2). A  
128 subset of images captured during the wet season were classified using a geographical object-based  
129 image analysis (GeoOBIA), using the LargeScaleMeanShift algorithm within the open source software  
130 Orfeo Toolbox (version 7.1.0), applied within the QGIS environment (version 3.8.1). GeoOBIA involves  
131 grouping contiguous pixels into ‘objects’ or ‘segments’ such that each segment is relatively  
132 homogenous (within a prespecified threshold) with respect to pixel characteristics. In this instance,



133 pixels were grouped into segments according the values of red, green, blue and elevation, with the  
134 latter being estimated using photogrammetric methods within Agisoft Metashape and then rescaled  
135 to lie between 0-255 to match the scale of the RGB values. We used trial and error to select the  
136 optimal segmentation parameters i.e. the spatial radius, range radius and minimum segment size. The  
137 smoothing radius determines how the amount by which the image is smoothed or filtered prior to the  
138 segmentation algorithm being implemented, whereas the range radius determines the similarity  
139 between pixels for grouping within the same segment. Similarity in this context refers to the Euclidean  
140 distance between two pixels. Supervised classification was then undertaken to assign each segment  
141 to one of 12 land cover classes (Table S2), including open water and aquatic vegetation (floating,  
142 emerging, submerged) based on the characteristics of that segment. Table S3 displays the segment-  
143 level characteristics used, which incorporated characteristics related to segment texture (Haralick  
144 textural features (Haralick, Dinstein, & Shanmugam, 1973)) in addition to a range of water and  
145 vegetation indices. The mean and variance of each of these were used in the classification.

146 Classification was undertaken using a set of 1800 segments all of which were firstly manually classified  
147 by the research team. One-third of the segments (n = 600) were within a 400m by 400m area and were  
148 used to train the classification algorithm. An additional one-third were in the same 400m by 400m  
149 area and were used for evaluating the accuracy of the classification within the same geographical area  
150 used for training (spatial interpolation), whereas the remaining 600 segments were distributed  
151 outside of the area used for training (spatial extrapolation). Classification was undertaken in R (version  
152 3.6.1) using the caret package and the Random Forests classification algorithm (Kuhn, 2008). Manually  
153 classified segments within the 400m by 400m area were randomly split into training and testing  
154 segments. A ten-fold cross validation approach was used to determine the optimal tuning parameters  
155 for the Random Forests algorithm, and the resulting model was then applied to the testing segments.  
156 An accuracy statistic (% of classifications that were correct), and the Cohen's kappa agreement statistic  
157 (Cohen, 1960) were then calculated for the interpolated and extrapolated testing segments initially  
158 considering all 12 land cover classes, followed by a reduced classification that only differentiated



159 between surface water (open water and aquatic vegetation) and any other class. The classification  
160 was then applied to the entire 600m by 800m area, and the percentage of the area classed as being  
161 covered in surface water was calculated. This process of randomly splitting the segments into training  
162 and testing groups was repeated 100 times, and the median and inter-quartile range of the resulting  
163 accuracy, kappa agreement and percentage surface water cover were reported.

164 A manual classification of surface water was also undertaken which involved systematically scanning  
165 through the image and creating a polygon around each area of surface water. The surface area of the  
166 image manually identified as being covered in water was then compared with that classified as surface  
167 water using the automated approach. The time taken and the computer resources required for each  
168 of these tasks were also recorded.

169 An overview of the image capture, processing and classification procedures is presented in Fig. 2.

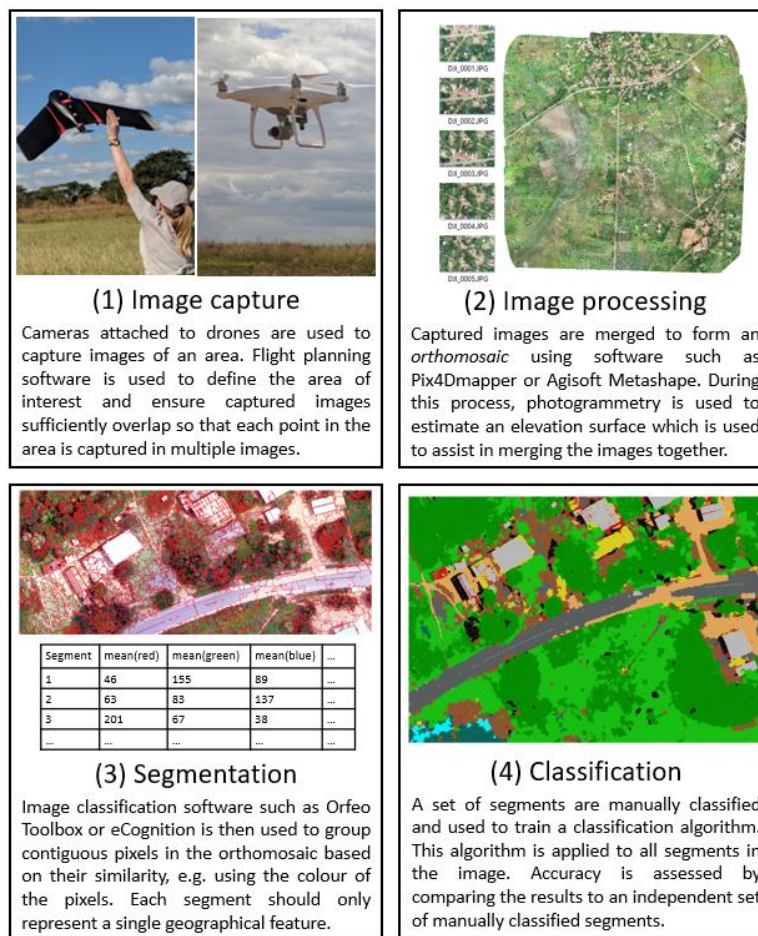

170

171 Figure 2: Processes undertaken to identify larval habitat from drone imagery.

172

173 *Entomological sampling*

174 Larval surveys were conducted concurrently to the drone image capture during each field visit (Fig. 1).  
175 Permission to collect these data were obtained from the Kasungu District Council, Kasungu Water  
176 Board and private landowners. As the first two field visits were undertaken during the dry season,  
177 sampling was focused in and around permanent water bodies which in this case were local reservoirs  
178 that provide drinking water and irrigation to the area. Sampling was undertaken at regular intervals  
179 around the periphery of reservoirs. Reservoirs were selected purposively based on their proximity to  
180 Kasungu town (for accessibility) and their proximity to human settlements. The third visit was  
181 conducted during the wet season, and sampling was focused around one of the reservoirs sampled in  
182 the previous dry season. Both temporary and permanent water bodies were sampled, with sampling  
183 sites identified from drone imagery captured the previous day. A subset of sites was sampled on four  
184 consecutive days to determine their consistency with respect to larval presence.

185 At each site, the presence and number of larvae were recorded using 10 repeated dips of the surface  
186 water, categorised by stage (L1/L2 or L3/L4) and either anopheline or culicine. To characterise malaria  
187 vectors in Kasungu as part of our broader efforts to understand transmission in the area, we raised all  
188 anopheline larvae to adult stage and identified morphologically to species (Coetzee, 2020). The  
189 location, description and photographs of each site were recorded using an Android Smartphone and  
190 Open Data Kit (ODK). These photographs were later used to classify each site according to the amount  
191 and type of vegetation present plus turbidity. A generalised linear mixed model was then fitted to the  
192 resulting presence/absence data to predict the likelihood that larvae were present from biotic site  
193 information obtained via drone imagery (vegetation type, coverage, turbidity). Models were fitted to  
194 presence/absence data for any larvae irrespective of stage or genus, and for late stage larvae only as  
195 characteristics of habitat containing late stage larvae are considered by WHO to be of greater

196 importance than early stage (World Health Organization, 2013). The productivity of the sampled sites  
197 with respect to the number of early or late stage larvae collected was also considered.

## 198 **Results**

### 199 *Image capturing*

200 During the three sampling periods we captured a total of 10 distinct areas in Kasungu, covering an  
201 area of 8.9km<sup>2</sup>. The two drones significantly differ in relation to operational costs, equipment and  
202 software requirements and usage. Tables 1 and 2 describe the primary differences in relation to initial  
203 costs and operational usage respectively. The fixed wing drone (eBeeSQ) had a greater initial cost than  
204 the multicopter Phantom 4 Pro due to it being inclusive of a NIR sensor, costing approximately £7000  
205 (inclusive of an educational discount), compared to £3,300 for a standard (RGB sensor) Phantom 4 Pro  
206 drone on which a NIR sensor was retrofitted. The eBeeSQ also required a high-spec laptop (£1000+)  
207 on which to run the software required to plan and conduct missions, whereas the Phantom 4 Pro was  
208 operated using free apps installed on GPS-enabled Android or iOS smartphone or tablet devices. On  
209 an operational level, the primary differences are between the flight times per battery, and the ease of  
210 use (Table 2). While, overall the Phantom 4 Pro is easier to use due to the small amount of open space  
211 required for take-off and landing, its limited battery life means that to cover a relatively modest area  
212 of 1km<sup>2</sup>, 2-3 individual flights are needed depending on whether a fixed launch site is used or whether  
213 this is adapted to minimise flight time. This comes at a cost of both time and money, particularly given  
214 each battery comes at a price of £150. The eBeeSQ fixed wing drone requires less energy to fly and  
215 therefore batteries last approximately twice as long (up to 1 hour in comparison to 30 minutes) than  
216 the Phantom 4 Pro. Therefore, while the time required to cover 1km<sup>2</sup> is longer (66 minutes compared  
217 to 38 minutes when flown at 120m above sea level [asl] which an 80% overlap in captured images),  
218 this area can be comfortably covered using two batteries and a single launch site, meaning that in  
219 practice the process is more efficient. The fixed-wing drone is however more difficult to operate than

220 the Phantom 4 Pro, requires a larger space for take-off and landing, and therefore cannot be used in  
 221 more densely vegetated areas.

222 Table 1: Comparison of approximate costs required to capture and process imagery captured by the  
 223 Phantom 4 Pro (rotor) and eBeeSQ (fixed wing).

|       |                        |                      | <b>Phantom 4 Pro</b>                                         | <b>GBP (£)</b> | <b>eBeeSQ</b>                                                | <b>GBP (£)</b> |
|-------|------------------------|----------------------|--------------------------------------------------------------|----------------|--------------------------------------------------------------|----------------|
| Costs | Initial costs          | Standard drone       | RGB only                                                     | £1500          | RGB only                                                     | N/A            |
|       |                        | Supplementary sensor | Sentera NDVI                                                 | £1800          | Parrot Sequoia                                               | £7000+         |
|       | Supplementary hardware |                      | Tablet                                                       | £150           | High spec laptop                                             | £1000+         |
|       |                        | Spare batteries      | <=30 mins flight time (per battery)                          | £150           | <=1hr flight time (per battery)                              | £90            |
|       | Supplementary software | Mission planning     | Pix4D capture                                                | £0             | eMotion Ag                                                   | £0             |
|       |                        | Image processing     | Agisoft MetaShape Professional Edition (Educational Licence) | £425           | Agisoft MetaShape Professional Edition (Educational Licence) | £425           |
|       |                        | Image classification | Orfeo Toolbox                                                | £0             | Orfeo Toolbox                                                | £0             |

224

225 Table 2: Practical and operational differences between the drones used in this study

|                                                                   |                          | <b>Phantom 4 Pro</b>          | <b>eBee SQ</b>                                   |
|-------------------------------------------------------------------|--------------------------|-------------------------------|--------------------------------------------------|
| Type of drone                                                     |                          | Multicopter/multirotor        | Fixed wing                                       |
| Battery life (mins)                                               |                          | 30                            | 60                                               |
| Practical flight time, accounting for take-off and landing (mins) |                          | 22                            | 45                                               |
| Area (km <sup>2</sup> ) covered per battery                       | 120m asl and 80% overlap | 0.49                          | 0.64                                             |
| Time (mins) required to cover 1km <sup>2</sup>                    | 120m asl and 80% overlap | 38                            | 66                                               |
|                                                                   |                          |                               |                                                  |
| Image resolution at 120m asl (cm/pixel)                           | RGB camera               | 3.3                           | 3.7                                              |
|                                                                   | NIR sensor               | 11                            | 11cm                                             |
|                                                                   |                          |                               |                                                  |
| Ease of use                                                       | Mission planning         | Via app on tablet/smartphone  | Via software installed on laptop computer        |
|                                                                   | Take-off and landing     | Vertical take-off and landing | Manual launch, and gradual descent in clear area |

226

227 *Image processing & classification*

228 We used Agisoft Metashape to process all images captured. Using the Phantom 4 Pro flying at 120m

229 above surface level, with an 70% overlap in images, a total of 782 individual images (6.2GB) covered



230 an area of 1.77km<sup>2</sup>. Processing these images in Agisoft Metashape in order to produce an orthomosaic  
231 of the area and an accompanying digital surface model took a total of 250 minutes using a computer  
232 with an Intel Core i7-6700 processor, 32GB RAM, resulting in an orthomosaic with a spatial resolution  
233 of 3cm (file size = 4.2GB). A subset of the image covering an area of 0.48km<sup>2</sup> (800m by 600m, file size  
234 = 1.9GB) was then selected for classification (Fig. 3).

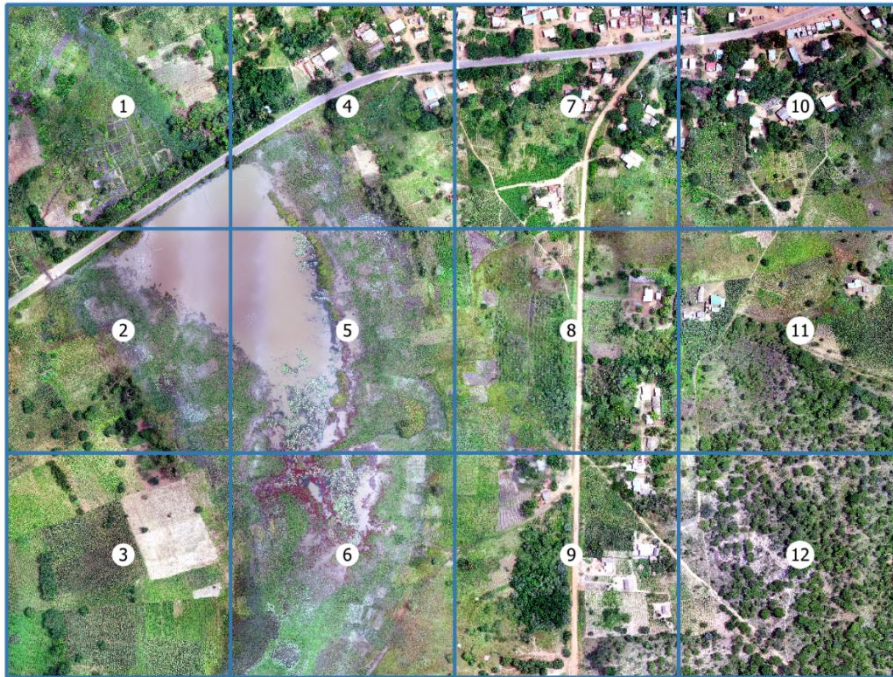

235 Figure 3: Image captured by the Phantom 4 Pro in Kasungu in February 2020 covering 800m by  
236 600m, with each grid representing 200m by 200m. Grids 4, 5, 7 and 8 were used for training the  
237 classification algorithm, and an assessment of its accuracy was made using features both within this  
238 area (interpolation) and in the surrounding grids (extrapolation).

239 A set of 1800 training and testing segments were then generated for the 12 identified land classes  
240 (Table S2), plus an additional category representing areas that were in shadow. The study area was  
241 partitioned into cells of 200m by 200m, labelled as cells 1-8 (Figure 3), and the training and testing  
242 segments were proportionally distributed throughout the cells as follows: two thirds (1200) of  
243 segments were within cells 4, 5, 7 & 8 covering an area of 400m by 400m. We refer to these as the  
244 *internal* segments. One third of segments (600) were within the remaining cells (1-3, 6, 9, 10-12) which  
245 we refer to as *external* segments.

246 Segmentation was performed using Orfeo Toolbox (OTB) functions within the QGIS environment.  
247 Figure 4 demonstrates the impact of varying values of the spatial and range radius on the resulting  
248 segmentation and the time taken to perform this segmentation over a 100m by 100m area using the  
249 computer specifications previously specified (see Methods). While increasing the spatial radius  
250 provided a more adequate balance between over-segmentation (single discrete features of interest  
251 being split into many segments) and under-segmentation (multiple discrete features of interest being  
252 grouped into a single segment), this came at the price of substantially increasing the processing time.  
253 Additional processing time is required to calculate the segment-level summaries (mean, variance) of  
254 each of the variables being used to classify the imagery, with processing time increasing as the number  
255 of segments increases.

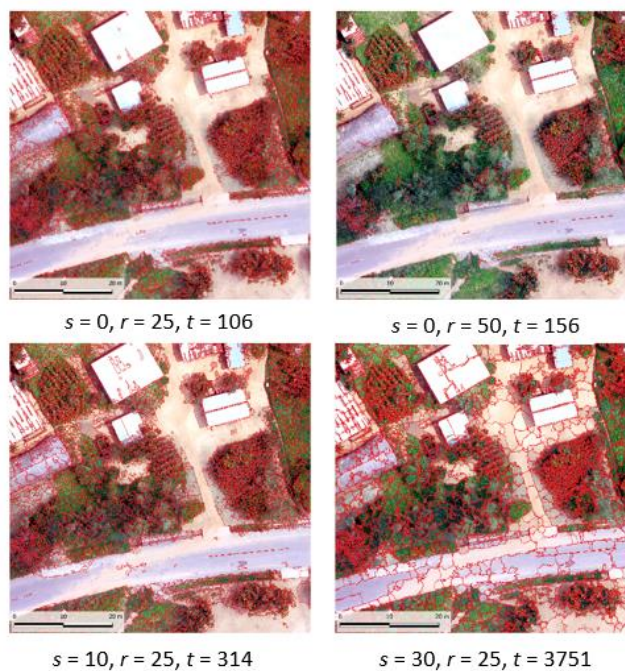

256 Figure 4: Examples of the segmentation process under different values for spatial radius  $s$  (0, 10, 30),  
257 range radius  $r$  (25, 50) with a minimum segment size of 100. Time  $t$  corresponds to the time taken in  
258 seconds to segment a 100m by 100m image with a spatial resolution of 3cm using the  
259 LargeScaleMeanShift algorithm in Orfeo Toolbox. This process includes calculating the mean and  
260 variance of the RGB and elevation values for each segment.



261 The segmentation process was then applied to the entire 800m by 600m area using the parameters  
262 10 (spatial radius), 25 (range radius) and 200 (minimum segment size), creating close to 800,000  
263 segments. The total processing time, which includes calculating the segment-level mean and variance  
264 of the RGB and elevation values, was 24.5 hours with an additional 15 hours taken to calculate the  
265 mean and variance of each of the additional variables under consideration (Table S2). Two  
266 classifications were then undertaken, one of which included the NIR-derived variables and one of  
267 which did not.

268 The resulting accuracies of these classifications are presented in Table 3, and a representation of the  
269 classified output from one area of Kasungu excluding NIR-derived variables is shown in Fig. 5, with the  
270 resulting image which includes NIR-derived variable presented in Figure S1. The corresponding  
271 variable importance plots are available in the SI (Figure S2). The results are very similar for both models  
272 fitted with and without the NIR-derived variables. The variable making the greatest contribution to  
273 the classification model in both cases is the mean elevation, with mean red, blue, green and brightness  
274 also important. While the NIR-derived variables NDVI and SAVI make the greatest contribution to the  
275 classification algorithm in the second model (Figure S2), Table 3 indicates that the inclusion of NIR-  
276 derived variables does not make any significant impact on classification accuracy, with overall median  
277 interpolated accuracy obtained using NIR-derived variables being marginally lower (0.904) than that  
278 obtained without using NIR-derived variables (0.910). There is a clear drop in both accuracy and kappa  
279 agreement when considering data from the extrapolation area, with accuracy reducing to 0.761 and  
280 0.798 when considering overall accuracy without and with NIR-derived variables respectively. This  
281 reduction in classification quality is less pronounced when considering surface water (open water or  
282 aquatic vegetation) accuracy alone compared with trying to distinguish between all 12 land cover  
283 classes. Trends in values of kappa are similar.

284 There is a close agreement in the percentage of the 400m by 600m area that is covered in surface  
285 water obtained by fitting the model with and without NIR-derived variables (without NIR: median =

286 18.3%; with NIR: median = 16.6%), with more variability observed in the NIR-inclusive models (Table  
 287 3). A manual review of the image, independently undertaken by two researches, resulted in a larger  
 288 percentage of the area being identified as surface water (21.2% and 20.1% by researchers 1 and 2  
 289 respectively), with the intersection of these two outputs (our '*manual surface water classification*' )  
 290 covering 20.1% of the area. This process of manual classification took approximately two hours to  
 291 complete.

292

293 Table 3: Summaries of classification accuracy (proportion of segments correctly classified) and kappa  
 294 agreement for all 12 classes (*overall*) and for *surface water* (including open water and aquatic  
 295 vegetation) versus all other classes for GeoOBIA obtained with and without NIR-derived variables.

|                        | Area         | Without NIR-derived variables |             | With NIR-derived variables |             |
|------------------------|--------------|-------------------------------|-------------|----------------------------|-------------|
|                        |              | Median                        | IQR         | Median                     | IQR         |
| Overall accuracy       | Interpolated | 0.910                         | 0.898-0.917 | 0.904                      | 0.899-0.908 |
|                        | Extrapolated | 0.761                         | 0.754-0.772 | 0.798                      | 0.758-0.811 |
| Surface water accuracy | Interpolated | 0.983                         | 0.980-0.986 | 0.982                      | 0.979-0.986 |
|                        | Extrapolated | 0.942                         | 0.941-0.947 | 0.936                      | 0.931-0.939 |
| Overall kappa          | Interpolated | 0.902                         | 0.888-0.909 | 0.895                      | 0.890-0.900 |
|                        | Extrapolated | 0.738                         | 0.731-0.750 | 0.779                      | 0.735-0.793 |
| Surface water kappa    | Interpolated | 0.960                         | 0.954-0.967 | 0.958                      | 0.950-0.967 |
|                        | Extrapolated | 0.873                         | 0.868-0.881 | 0.855                      | 0.844-0.864 |

|                 |     |      |           |      |           |
|-----------------|-----|------|-----------|------|-----------|
|                 |     |      |           |      |           |
| % surface water | All | 18.3 | 17.3-20.9 | 16.6 | 15.7-22.0 |

296

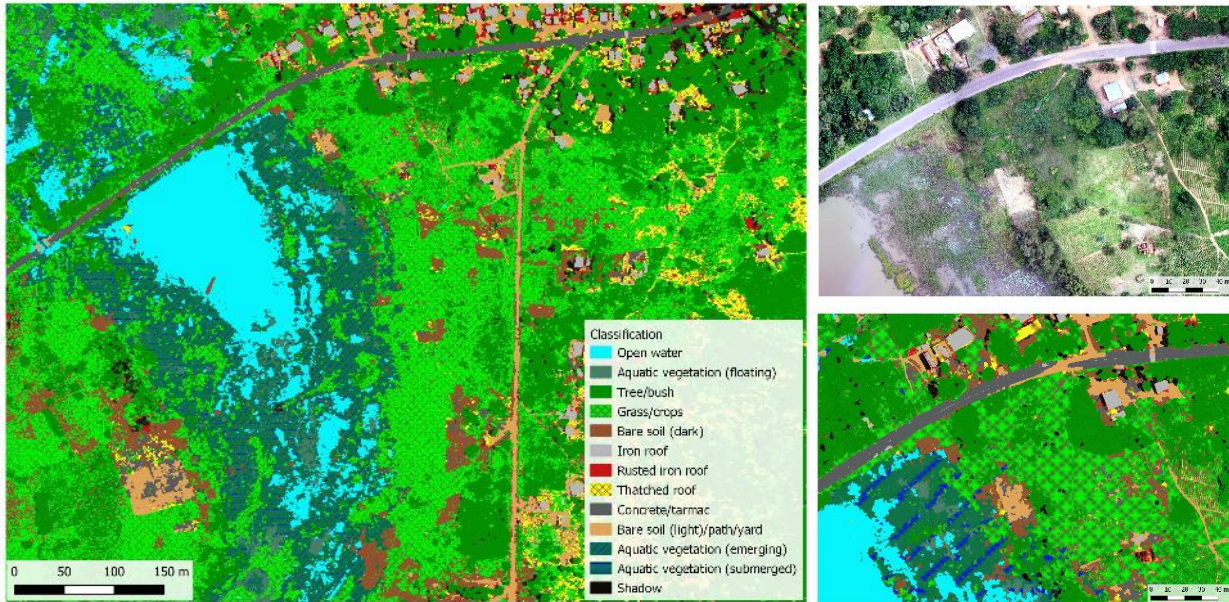

297

298 Figure 5: Example of a classification obtained for the entire study area using the random forests  
 299 algorithm without including NIR-derived variables (left), with a more detailed view of a smaller area  
 300 comparing the original image (top right) with the classified image (bottom right).

301

### 302 *Entomological surveys*

303 During three separate field visits (June 2018, October 2019, and February 2020) a total of 326 larval  
 304 sites were sampled (available through the Figshare repository (Stanton, 2020)). During the dry periods  
 305 these samples were focused along the shorelines of larger permanent water bodies (296 sites), with a  
 306 mixture of 30 temporary and permanent sites surveyed during the wet season. Both anopheline and  
 307 culicine larvae were found throughout the area during each sampling period (56% of sites sampled),  
 308 with the lowest proportion of positive sites found in the late dry season (76% in June 2018, 16% in  
 309 October 2019, 70% in February 2020). No clear sympatry was observed between anopheline and



310 culicine larvae in this study. For example, of the 321 sites where late stage larvae data were recorded  
311 (excluding 5 sites with missing data), larvae were observed in 31% (101) of samples with only 7% (24)  
312 sites containing both anophelines and culicines. In the area surrounding the Malangano site (Fig. 3) in  
313 February 2020, we morphologically identified 177 out of 297 anopheline specimens to species level,  
314 finding a predominance of *An. gambiae s.l.* (87.6%) followed by *An. coustani* (8.5%) and very few *An.*  
315 *pretoriensis* (2.3%) and *An. funestus* (1.7%).

316 At each site, GPS coordinates were recorded using the ODK app, photographs were taken using a  
317 smartphone, and aerial imagery was captured (Fig. 6). Samples were taken within approximately one  
318 metre of where the researcher stood to record the coordinate, however, as GPS coordinates have an  
319 accuracy of approximately three metres it was not possible to pinpoint precisely where the samples  
320 were taken within the aerial imagery.

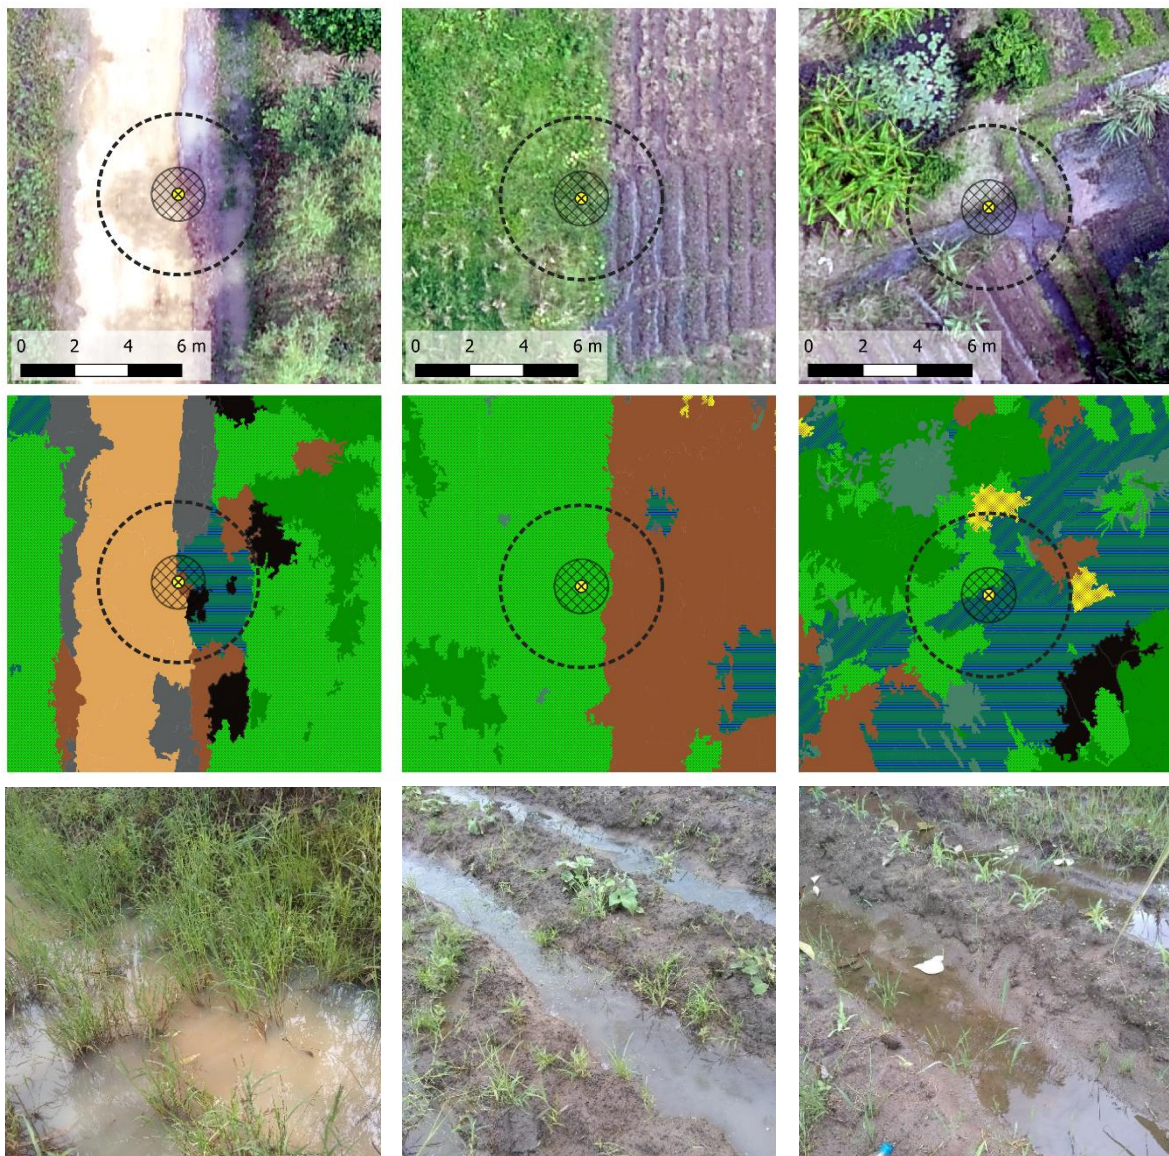

324

325 Figure 6: Examples of sampling sites where anopheline larvae were found. The top row indicates the  
 326 precise GPS location captured using ODK (yellow circle), the expected sampling area based on these  
 327 coordinates (1m radius), and the expected accuracy of the coordinates (3m radius), overlaid on top of  
 328 the drone imagery. The middle row presents the classified imagery for these sites and the bottom row  
 329 contains photographs of each site taken at the time of sampling.

330 Using the photographs, we characterised each site according to presence/absence of larvae and  
 331 sample site characteristics including dominant vegetation type (none, floating, submerged, emerging),  
 332 vegetation cover (none, <1/3, 1/3 - 2/3, >2/3) and turbidity. Vegetation was present in most sites  
 333 sampled (284/326, 87%). Of these, 64% (183) contained emergent vegetation, 20% (57) contained  
 334 submerged and 15% (44) contained floating vegetation. Vegetation cover varied evenly across sites,  
 335 with 32% having low (0-1/3) coverage, 35% having moderate (1/3-2/3 coverage) and 33% having high  
 336 (>2/3) coverage. There was an interaction between vegetation type and coverage, such that sites with  
 337 floating vegetation rarely had high vegetation coverage. With regards to turbidity, 40% (129) of sites  
 338 were classed as turbid whereas the remaining 60% (197) were clear.

339 Table 4: Summaries of the larval sampling sites by presence/absence of mosquito larvae found. A  
 340 similar table for late stage (L3-L4) larvae can be found in the SI (Table S4).

|                        |                                | <b>Any Larvae</b> |            |                |            |              |  |
|------------------------|--------------------------------|-------------------|------------|----------------|------------|--------------|--|
|                        |                                | <b>Absent</b>     |            | <b>Present</b> |            | <b>Total</b> |  |
|                        |                                | <b>N</b>          | <b>(%)</b> | <b>N</b>       | <b>(%)</b> | <b>N</b>     |  |
| <b>Sampling period</b> | <b>2018 (early dry season)</b> | 31                | 24         | 97             | 76         | 128          |  |
|                        | <b>2019 (late dry season)</b>  | 141               | 84         | 27             | 16         | 168          |  |

|                        |                          |     |    |     |    |     |
|------------------------|--------------------------|-----|----|-----|----|-----|
|                        | <b>2020 (wet season)</b> | 9   | 30 | 21  | 70 | 30  |
|                        |                          |     |    |     |    |     |
| <b>Vegetation</b>      | <b>Yes</b>               | 148 | 52 | 136 | 48 | 284 |
|                        | <b>No</b>                | 33  | 79 | 9   | 21 | 42  |
|                        |                          |     |    |     |    |     |
| <b>Dominant</b>        | <b>None</b>              | 33  | 79 | 9   | 21 | 42  |
| <b>vegetation type</b> | <b>Floating</b>          | 27  | 61 | 17  | 39 | 44  |
|                        | <b>Submerged</b>         | 30  | 53 | 27  | 47 | 57  |
|                        | <b>Emerging</b>          | 91  | 50 | 92  | 50 | 183 |
|                        |                          |     |    |     |    |     |
| <b>Vegetation</b>      | <b>0</b>                 | 33  | 79 | 9   | 21 | 42  |
| <b>cover</b>           | <b>&lt;1/3</b>           | 56  | 62 | 35  | 38 | 91  |
|                        | <b>1/3 - 2/3</b>         | 52  | 53 | 46  | 47 | 98  |
|                        | <b>&gt;2/3</b>           | 40  | 42 | 55  | 58 | 95  |
|                        |                          |     |    |     |    |     |
| <b>Turbidity</b>       | <b>Turbid</b>            | 74  | 57 | 55  | 43 | 129 |
|                        | <b>Clear</b>             | 107 | 54 | 90  | 46 | 197 |
|                        |                          |     |    |     |    |     |
| <b>Total</b>           |                          | 181 | 56 | 145 | 44 | 326 |

341

342 A strong interaction was observed between vegetation type and coverage, therefore when fitting the  
 343 GLMMs to the presence/absence data we did not consider these variables in the model  
 344 simultaneously, but rather explored which of the two resulted in the best fitting model with regards  
 345 to AIC. After counting for the effect of sampling period and site, there was a strong association  
 346 between the presence of vegetation and the likelihood of any larvae (log-OR=1.44, p=0.01), however



347 accounting for vegetation coverage or vegetation type did not improve the model further. When  
348 considering *Anopheles* L3 and L4 larvae only, the model was improved when vegetation type was  
349 considered such that larvae were more likely to be present when emerging (log-OR=1.14, p=0.07) or  
350 submerged (log-OR=1.90, p=0.01) vegetation were available, compared to sites with no vegetation.  
351 With regards to productivity, while there was variability in the abundance of larvae sampled per site  
352 (145 sites, min = 1, median = 4, max = 56), there were insufficient high productivity sites to formally  
353 explore any trends in their characteristics.

354 During the wet season, 10 sites were repeatedly sampled over four days, with larvae consistently  
355 observed in four sites and no larvae being found on at least one day in the remaining six sites. We  
356 observed that due to changes in the environment it was difficult to resample the same locations across  
357 larger time scales. Temporary surface water observed in the wet season dried up even after just a few  
358 days without rain and shorelines of permanent water bodies varied substantially both between  
359 seasons and between the same season over consecutive years (Fig. 7). For example, we observed that  
360 images captured later in the dry season (October) in 2019 were wetter than those captured in the  
361 early dry season (June) in 2018 at the Chitete reservoir.

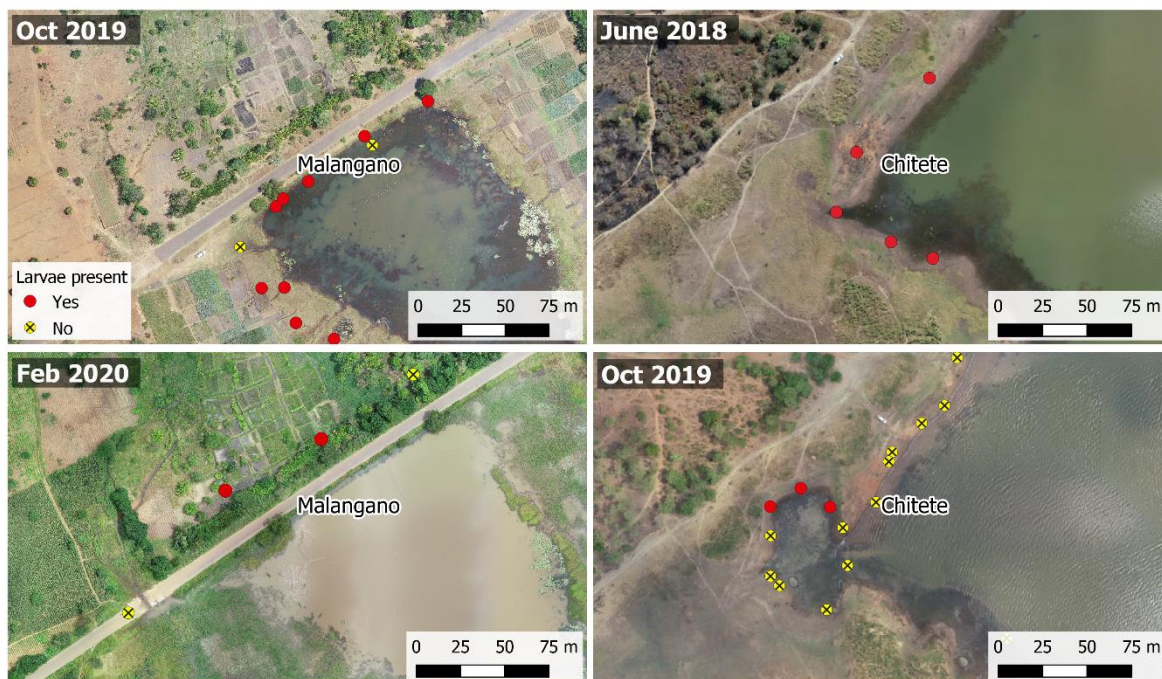

362



363 *Figure 7: Comparisons of aerial images captured at different seasonal time points. Left images display*  
364 *a comparison between consecutive dry (Oct 2019) and wet (Feb 2020) seasons around the Malangano*  
365 *dam. Right images display comparisons between dry seasons over two consecutive years (June 2018,*  
366 *Oct 2019) around the Chitete dam.*

## 367 **Discussion**

### 368 *Image capturing*

369 Image capture using drones inevitably leads to technical and skills-based challenges and we highlight  
370 a few of these here in the context of searching for water bodies in a rural setting. Aside from hardware  
371 and software issues we noted that flight experience was a key requirement to determine optimal flight  
372 times as neither the rotor or fixed wing drone could be flown in wet or windy conditions, and we  
373 experience the impact of extreme weather on the hardware with multiple occasions of over-heating  
374 on warm days. This highlighted the need for extensive drone piloting training by the operator. The  
375 country's drone regulations also need to be taken into careful consideration. In Malawi, data capture  
376 was facilitated by the relationship between UNICEF and the Department of Civil Aviation and a toolkit  
377 is currently being developed to outline the procedures that need to be followed by those wishing to  
378 fly drones for non-commercial purposes ([https://www.updwg.org/wp-](https://www.updwg.org/wp-content/uploads/2019/12/Malawi-RPA-Toolkit-2019_Dec.-Final.pdf)  
379 [content/uploads/2019/12/Malawi-RPA-Toolkit-2019\\_Dec.-Final.pdf](https://www.updwg.org/wp-content/uploads/2019/12/Malawi-RPA-Toolkit-2019_Dec.-Final.pdf)). While regulations vary by  
380 country, national civil aviation authorities are also requiring drone pilots to obtain accredited  
381 qualifications and seek appropriate permissions before using drones for research or humanitarian  
382 purposes. Training courses which cover both the operational and regulatory aspects of drone flying  
383 are currently quite sparse in sub-Saharan Africa and this may require future pilots to travel outside of  
384 their own country to gain the necessary experience. Should a malaria control implementer wish to use  
385 drone imagery within their programmes, they may therefore incur significant expense both in  
386 purchasing the equipment and training their staff. A solution to this would be to outsource the image  
387 capturing to qualified drone pilots operating in the area.

388 An additional bottleneck is the availability of hardware within the country of operation. While it may  
389 be possible to purchase off-the-shelf drones in-country, should any technical issues arise, obtaining  
390 part replacements or repairs becomes problematic and expensive. Investments are therefore being  
391 made in 'home-grown' drones, to support local economies, decrease the cost of equipment, and make  
392 repairs much more easily accessible. In Malawi for example, MicroMek (<https://www.micromek.net/>)  
393 manufacture the low-cost fixed wing drone known as EcoSoar (Standridge, 2018), for both  
394 transporting goods and capturing imagery.

395

### 396 *Image processing*

397 Processing drone imagery to create the orthomosaics is time-consuming, requires a high-spec  
398 computer and a large capacity for data storage. Therefore, to use this imagery in the field, an NMCP  
399 would require people skilled in both image capture and processing, plus access to the relevant  
400 software. These skills are not usually taught as part of standard drone pilot training, however this may  
401 change as the potential for using drone technology for humanitarian purposes is increasingly realised.  
402 For example, the African Drone and Data Academy was launched in January 2020 in Malawi to build  
403 capacity in both drone piloting and drone image processing and analysis (UNICEF, 2020).

404 Image classification is appealing because once the algorithm has been trained, it can simply be applied  
405 to any additional imagery captured without any or only a little additional data being required. In our  
406 analysis we showed that there was a decline in classification accuracy in areas within very close  
407 proximity to that used to train the algorithm and noted that even in this small area there were  
408 important land cover classes in the extrapolation area that did not appear in the training area e.g. red  
409 algae in the water. This challenge is likely to be exacerbated when considering areas further apart, or  
410 data collected at different time points. As more data are collected these limitations may be overcome,  
411 however in the short term, the effort required by the end-user e.g. an individual NMCP to train a  
412 classification algorithm may outweigh its benefits. In this demonstration we implemented a

413 geographical object-based classification approach which generated the segments and computing  
414 segment-level characteristics prior to training and applying the classification algorithm. The segment-  
415 generating process can be very time-consuming depending on the values of the segmentation  
416 parameter referred to as the spatial radius, and the size of the area being classified. While other  
417 classification techniques such as pixel-based classification may be quicker to perform, an object-based  
418 approach is the most appropriate for very high-resolution images such as that generated by drones  
419 (Pande-Chhetri, Abd-Elrahman, Liu, Morton, & Wilhelm, 2017). The cost and benefits of accuracy  
420 against processing time therefore need to be considered should an NMCP wish to perform image  
421 classification in-house. The role of additional sensors in the image classification process is also unclear.  
422 In this analysis we compared the classification accuracy using imagery captured from a standard  
423 camera only (RGB), plus additional imagery captured by a much more expensive NIR sensor. While our  
424 performance metrics indicated very little difference in the accuracy obtained using the two  
425 approaches, a more extensive investigation would need to be undertaken over a more  
426 environmentally diverse area before we can conclude whether or not there is a benefit to  
427 incorporating this additional technology.

428 A more practical solution to 'automated' image classification may be to persevere with the less  
429 efficient, but lower skilled task of manual classification. This task is, however, not without its  
430 drawbacks, as human error can easily miss small areas, or misclassify water containing a lot of aquatic  
431 vegetation as land and vice versa. These latter '*missed*' areas are of significance, as *Anopheles*  
432 mosquitoes are generally found in water containing vegetation. The fact that there was a 10%  
433 discrepancy in the manual classification undertaken by two independent researchers, both of whom  
434 were familiar with the study area, demonstrates the fallibility in this method.

435 As with the drone image capture, an alternative is to outsource these activities to an organisation  
436 which specialises in image processing and classification. Additionally, cloud-based computing services  
437 such as DroneDeploy's Map Engine (DroneDeploy, 2018) and Google Earth Engine (Mutanga & Kumar,

438 2019) could be used as these allow individuals/groups to harness the power of remote servers to  
439 manage and manipulate the data. This approach could facilitate the development of more automated  
440 habitat classification approaches i.e. using data from other organisations, previous field or  
441 professional expertise in remote sensing to develop classification algorithms that don't require the  
442 use of bespoke training data. The TropWet tool developed by Hardy, Oakes, & Ettritch (2020) is a  
443 demonstration of this in which satellite imagery (Landsat, 30m resolution) is automatically classified  
444 for a user-specified area and time period using a Google Earth Engine interface.

445 There are still practical challenges with these approaches, particularly relating to the upload of large  
446 image files to enable these processes to be undertaken remotely, however these may be preferable  
447 to the more technical challenge of managing the data in-house.

448

#### 449 *Entomological survey*

450 Larval surveys are an important part of the process of LSM both to confirm the species of mosquitoes  
451 found in the area, to characterise the types of surface water where larvae are likely to be found, and  
452 to monitor the progress of any subsequent intervention. Larval surveys are however a time-consuming  
453 process, particularly when undertaken during the wet season during which areas become inaccessible  
454 following heavy rains. The role of drones in LSM is not to completely remove the need for larval  
455 surveys, but to help differentiate between water bodies with respect to their potential as larval habitat  
456 and/or to differentiate sites according to their potential larval productivity.

457 We note that in our study that vegetation coverage appears to be important when considering  
458 presence/absence of late stage *Anopheles* larvae, with coverage correlated with the type of vegetation  
459 found i.e. coverage of floating vegetation was likely to be less than that of emergent or submerged  
460 vegetation. A full understanding the larval ecology of the local individual malaria vectors would greatly  
461 assist a targeted LSM approach aided by drone-imagery support. In south-eastern Tanzania, a basic

462 characterisation of *An. funestus* larval habitats provides support that this species occupies small  
463 spring-fed pools, permanent natural ponds and slow-moving waters each of which fall under the ‘few,  
464 fixed and findable’ paradigm (Nambunga et al., 2020). In a recent study in Southern Malawi (Gowelo  
465 et al., 2020), *An. arabiensis* was the dominant species, with high densities being found in aquatic  
466 habitats surrounded by bare soil. A species-specific approach to identifying larval habitat using drone  
467 imagery may therefore be required, with imagery captured throughout the year to better understand  
468 the temporal dynamics of larval habitat and thereby optimise the impact of any potential intervention.  
469 These images could further be used to monitor the progress of LSM campaigns with, for example, a  
470 more accurate estimates of LSM coverage and demonstratable changes in the landscape because of  
471 habitat removal/modification. Further entomological surveillance remains pivotal to establish where  
472 and when LSM should be deployed and measure the impact of the intervention on malaria  
473 transmission potential.

#### 474 Conclusions

475 Our study demonstrates the potential for drone imagery to be used as a tool to support the  
476 identification of mosquito larval habitat in rural areas where malaria is endemic. While this technology  
477 has the capacity to complement the more labour-intensive approach of identifying larval habitat from  
478 the ground, there are technical challenges to overcome before it can be smoothly integrated into  
479 malaria control activities. We believe that outsourcing the capturing and processing of drone imagery  
480 to private companies with the equipment and skills necessary to extract the required information is a  
481 more practical approach to developing equivalent skills in house. These services are becoming  
482 increasingly available in other sectors such as agriculture, forestry and environmental monitoring and  
483 there are promising developments in the African drone sector to support this local capacity. We do  
484 however continue to emphasise that drone imagery should not be used to completely replace larval  
485 surveys. Instead we envisage that this technology could provide supplementary information which  
486 may help to reduce the time spent finding locations to be sampled, monitor environmental changes

487 over time and help to guide the frequency and scale of any LSM intervention, ultimately increasing its  
488 potential for success. Further consultations between experts and stakeholders in the fields of drones,  
489 image analysis and vector control are needed to develop more detailed guidance on how this  
490 technology can be most effectively exploited.

491

#### 492 **Author contributions**

493 MCS and CMJ conceived the ideas and designed methodology; all authors collected the data; MCS, PK  
494 and KZ analysed the data; MCS and CMJ led the writing of the manuscript. All authors contributed  
495 critically to the drafts and gave final approval for publication.

496

#### 497 **Data availability**

498 Entomological data can be accessed at: <https://figshare.com/s/25102b084f56f41a1ca8>

499 All drone imagery referenced in this paper has been uploaded to OpenAerialMap from which it can be  
500 freely downloaded ([https://map.openaerialmap.org/#/33.489675521850586,-  
501 13.050633215031182,13/user/5f1fe6f357ddda00054a0647?k=mmgy4y](https://map.openaerialmap.org/#/33.489675521850586,-13.050633215031182,13/user/5f1fe6f357ddda00054a0647?k=mmgy4y)).

502

#### 503 **References**

504 Beck-Johnson, L. M., Nelson, W. A., Paaijmans, K. P., Read, A. F., Thomas, M. B., & Bjørnstad, O. N.  
505 (2013). The effect of temperature on Anopheles mosquito population dynamics and the  
506 potential for malaria transmission. *PLoS ONE*, 8(11), 79276. doi: 10.1371/journal.pone.0079276

507 Bousema, T., Stresman, G., Baidjoe, A. Y., Bradley, J., Knight, P., Stone, W., ... Smith, D. (2016). The  
508 Impact of Hotspot-Targeted Interventions on Malaria Transmission in Rachuonyo South District  
509 in the Western Kenyan Highlands: A Cluster-Randomized Controlled Trial. *PLOS Medicine*, 13(4),

- 510 e1001993. doi: 10.1371/journal.pmed.1001993
- 511 Carrasco-Escobar, G., Manrique, E., Ruiz-Cabrejos, J., Saavedra, M., Alava, F., Bickersmith, S., ...  
512 Gamboa, D. (2019). High-accuracy detection of malaria vector larval habitats using drone-based  
513 multispectral imagery. *PLOS Neglected Tropical Diseases*, 13(1), e0007105. doi:  
514 10.1371/journal.pntd.0007105
- 515 Chipeta, M. G., Giorgi, E., Mategula, D., Macharia, P. M., Ligomba, C., Munyenyembe, A., ... Kayange,  
516 M. (2019). Geostatistical analysis of Malawi's changing malaria transmission from 2010 to  
517 2017. *Wellcome Open Research*, 4, 57. doi: 10.12688/wellcomeopenres.15193.2
- 518 Coetzee, M. (2020). Key to the females of Afrotropical Anopheles mosquitoes (Diptera: Culicidae).  
519 *Malaria Journal*, 19(1), 70. doi: 10.1186/s12936-020-3144-9
- 520 Cohen, J. (1960). A coefficient of agreement for nominal scales. *Educational and Psychological*  
521 *Measurement*, 20(1), 37–46.
- 522 DroneDeploy. (2018). Introducing Map Engine. Retrieved June 29, 2020, from  
523 <https://medium.com/aerial-acuity/introducing-map-engine-cd3ef93bc730>
- 524 Eneh, L. K., Fillinger, U., Borg Karlson, A. K., Kuttuva Rajarao, G., & Lindh, J. (2019). Anopheles  
525 arabiensis oviposition site selection in response to habitat persistence and associated  
526 physicochemical parameters, bacteria and volatile profiles. *Medical and Veterinary*  
527 *Entomology*, 33(1), 56–67. doi: 10.1111/mve.12336
- 528 Fillinger, U., & Lindsay, S. W. (2011). Larval source management for malaria control in Africa: myths  
529 and reality. *Malaria Journal*, 10(353).
- 530 Gowelo, S. A., Chirombo, J., Koenraad, C. J. M., Mzilahowa, T., Berg, H., Takken, W., & McCann, R. S.  
531 (2020). Characterisation of anopheline larval habitats in southern Malawi. *Acta Tropica*,  
532 105558. doi: 10.1016/j.actatropica.2020.105558



- 533 Haralick, R. M., Dinstein, I., & Shanmugam, K. (1973). Textural Features for Image Classification. *IEEE*  
534 *Transactions on Systems, Man and Cybernetics, SMC-3*(6), 610–621. doi:  
535 10.1109/TSMC.1973.4309314
- 536 Hardy, A., Makame, M., Cross, D., Majambere, S., & Msellem, M. (2017). Using low-cost drones to  
537 map malaria vector habitats. *Parasites and Vectors, 10*(29).
- 538 Hardy, A., Oakes, G., & Ettritch, G. (2020). Tropical Wetland (TropWet) Mapping Tool: The Automatic  
539 Detection of Open and Vegetated Waterbodies in Google Earth Engine for Tropical Wetlands.  
540 *Remote Sensing, 12*(7), 1182. doi: 10.3390/rs12071182
- 541 Hsiang, M. S., Ntuku, H., Roberts, K. W., Dufour, M. S. K., Whittemore, B., Tambo, M., ... Gosling, R.  
542 (2020). Effectiveness of reactive focal mass drug administration and reactive focal vector  
543 control to reduce malaria transmission in the low malaria-endemic setting of Namibia: a  
544 cluster-randomised controlled, open-label, two-by-two factorial design trial. *The Lancet,*  
545 *395*(10233), 1361–1373. doi: 10.1016/S0140-6736(20)30470-0
- 546 Kibret, S., Lautze, J., McCartney, M., Nhamo, L., & Wilson, G. G. (2016). Malaria and large dams in  
547 sub-Saharan Africa: future impacts in a changing climate. *Malaria Journal, 15*(448).
- 548 Killeen, G. F. (2014, August 23). Characterizing, controlling and eliminating residual malaria  
549 transmission. *Malaria Journal, Vol. 13*, pp. 1–22. doi: 10.1186/1475-2875-13-330
- 550 Kuhn, M. (2008). Building Predictive Models in R Using the caret Package. *Journal of Statistical*  
551 *Software, 28*(5), 1–26. doi: 10.18637/jss.v028.i05
- 552 Musiime, A. K., Smith, D. L., Kilama, M., Geoffrey, O., Kyagamba, P., Rek, J., ... Lindsay, S. W. (2020).  
553 Identification and characterization of immature Anopheles and culicines (Diptera: Culicidae) at  
554 three sites of varying malaria transmission intensities in Uganda. *Malaria Journal, 19*(1), 221.  
555 doi: 10.1186/s12936-020-03304-7
- 556 Mutanga, O., & Kumar, L. (2019). Google Earth Engine Applications. *Remote Sensing, 11*(5), 591. doi:

557 10.3390/rs11050591

558 Nambunga, I. H., Ngowo, H. S., Mapua, S. A., Hape, E. E., Msugupakulya, B. J., Msaky, D. S., ... Okumu,  
559 F. O. (2020). Aquatic habitats of the malaria vector *Anopheles funestus* in rural south-eastern  
560 Tanzania. *Malaria Journal*, 19(1), 219. doi: 10.1186/s12936-020-03295-5

561 Pande-Chhetri, R., Abd-Elrahman, A., Liu, T., Morton, J., & Wilhelm, V. L. (2017). Object-based  
562 classification of wetland vegetation using very high-resolution unmanned air system imagery.  
563 *European Journal of Remote Sensing*, 50(1), 564–576. doi: 10.1080/22797254.2017.1373602

564 Sentera. (2020). Sentera. Retrieved June 18, 2020, from <https://sentera.com/sensors/>

565 Standridge, Z. (2018). *Design and Development of Low-cost Multi-function UAV Suitable for*  
566 *Production and Operation in Low Resource Environments* (Virginia Polytechnic Institute and  
567 State University). Retrieved from  
568 [https://www.researchgate.net/publication/326582792\\_Design\\_and\\_Development\\_of\\_Low-](https://www.researchgate.net/publication/326582792_Design_and_Development_of_Low-cost_Multi-function_UAV_Suitable_for_Production_and_Operation_in_Low_Resource_Environments)  
569 [cost\\_Multi-](https://www.researchgate.net/publication/326582792_Design_and_Development_of_Low-cost_Multi-function_UAV_Suitable_for_Production_and_Operation_in_Low_Resource_Environments)  
570 [function\\_UAV\\_Suitable\\_for\\_Production\\_and\\_Operation\\_in\\_Low\\_Resource\\_Environments](https://www.researchgate.net/publication/326582792_Design_and_Development_of_Low-cost_Multi-function_UAV_Suitable_for_Production_and_Operation_in_Low_Resource_Environments)

571 Stanton, M. C. (2020). Figshare dataset: Larval sampling data, Kasungu. Retrieved from Figshare  
572 website: <https://figshare.com/s/25102b084f56f41a1ca8>

573 Stresman, G., Bousema, T., & Cook, J. (2019, October 1). Malaria Hotspots: Is There Epidemiological  
574 Evidence for Fine-Scale Spatial Targeting of Interventions? *Trends in Parasitology*, Vol. 35, pp.  
575 822–834. doi: 10.1016/j.pt.2019.07.013

576 Sy, O., Niang, E. H. A., Diallo, A., Ndiaye, A., Konaté, L., Ba, E. H. C. C., ... Faye, O. (2019). Evaluation of  
577 the effectiveness of a targeted community-based IRS approach for malaria elimination in an  
578 area of low malaria transmission of the central-western Senegal. *Parasite Epidemiology and*  
579 *Control*, 6, e00109. doi: 10.1016/j.parepi.2019.e00109

580 Tusting, L. S., Thwing, J., Sinclair, D., Fillinger, U., Gimnig, J., Bonner, K. E., ... Lindsay, S. W. (2013).

- 581 Mosquito larval source management for controlling malaria. In J. Thwing (Ed.), *Cochrane*  
582 *Database of Systematic Reviews* (p. CD008923). doi: 10.1002/14651858.CD008923.pub2
- 583 UNICEF. (2020). African Drone and Data Academy. Retrieved from  
584 <https://www.unicef.org/malawi/african-drone-and-data-academy-malawi>
- 585 World Health Organization. (2013). *Larval source management – a supplementary measure for*  
586 *malaria vector control. An operational manual*. Retrieved from  
587 <http://www.who.int/malaria/publications/atoz/9789241505604/en/>
- 588
- 589
